# Supplementary material
Source: PubMed Central journal article supplement (PMC8816875)

Supplemental Material for:

**Evaluation of treatment tolerability utilizing a toxicity summary measure with Patient-Reported Outcomes version of the Common Terminology Criteria for Adverse Events (PRO-CTCAE) data**

Blake T. Langlais, et al.

- Supplemental Figures 1. PRO-CTCAE Constipation Item Group and Density Histograms, by Arm
- Supplemental Figures 2. PRO-CTCAE Decreased Appetite Item Group and Density Histograms, by Arm
- Supplemental Figures 3. PRO-CTCAE Diarrhea Item Group and Density Histograms, by Arm
- Supplemental Figures 4. PRO-CTCAE Fatigue Item Group and Density Histograms, by Arm
- Supplemental Figures 5. PRO-CTCAE Insomnia Item Group and Density Histograms, by Arm
- Supplemental Figures 6. PRO-CTCAE Nausea Item Group and Density Histograms, by Arm
- Supplemental Figures 7. PRO-CTCAE Numbness/Tingling in Hands/Feet Item Group and Density Histograms, by Arm
- Supplemental Figures 8. PRO-CTCAE Pain Item Group and Density Histograms, by Arm
- Supplemental Figures 9. PRO-CTCAE Shortness of Breath Item Group and Density Histograms, by Arm
- Supplemental Figures 10. PRO-CTCAE Vomiting Item Group and Density Histograms, by Arm
- Supplemental Figures 11. Density Histograms for all PROCTCAE Items and Composites, by Arm

### Supplemental Figure 1. PRO-CTCAE Constipation Item Group

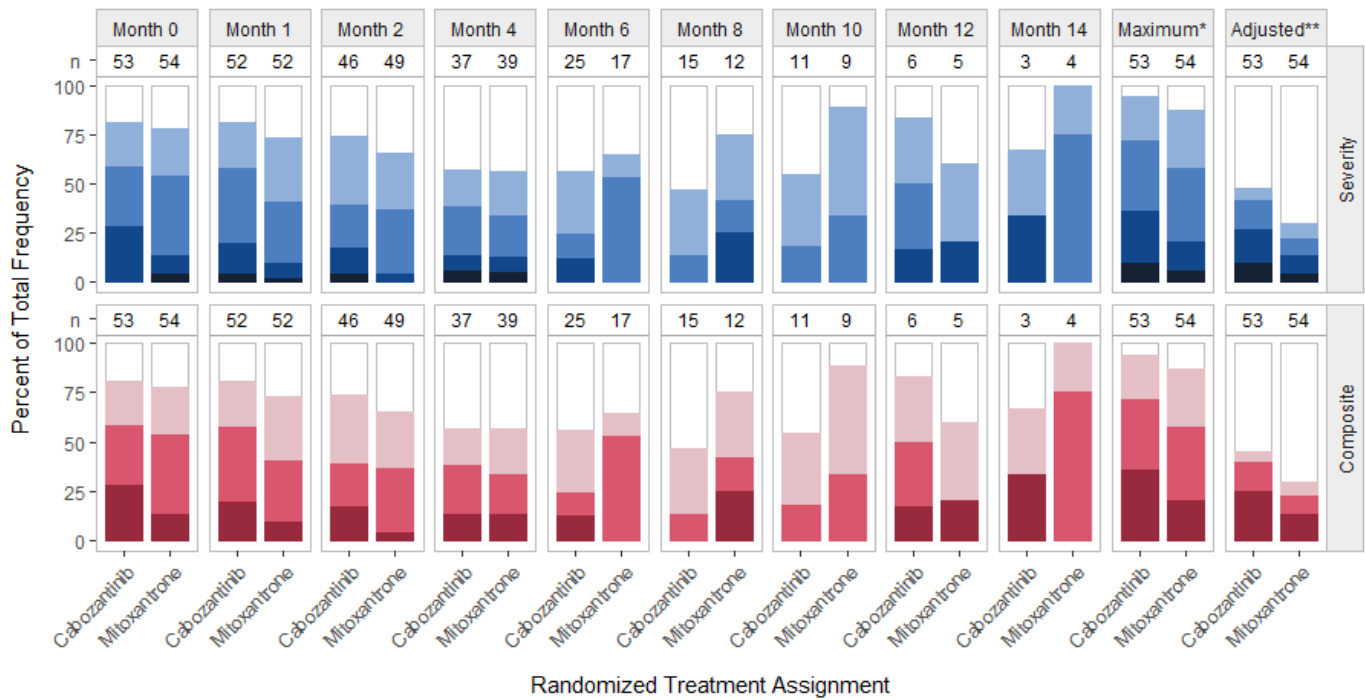

Severity: □ None / ■ Mild / ■ Moderate / ■ Severe / ■ Very severe

Composite Grade: □ 0 / ■ 1 / ■ 2 / ■ 3

Column labels (n) show the number of subjects with an observed symptom score or grade.

\*Maximum score or grade reported post-baseline per patient.

\*\*Maximum score or grade reported post-baseline per patient when including only scores that were worse than the patient's baseline score.

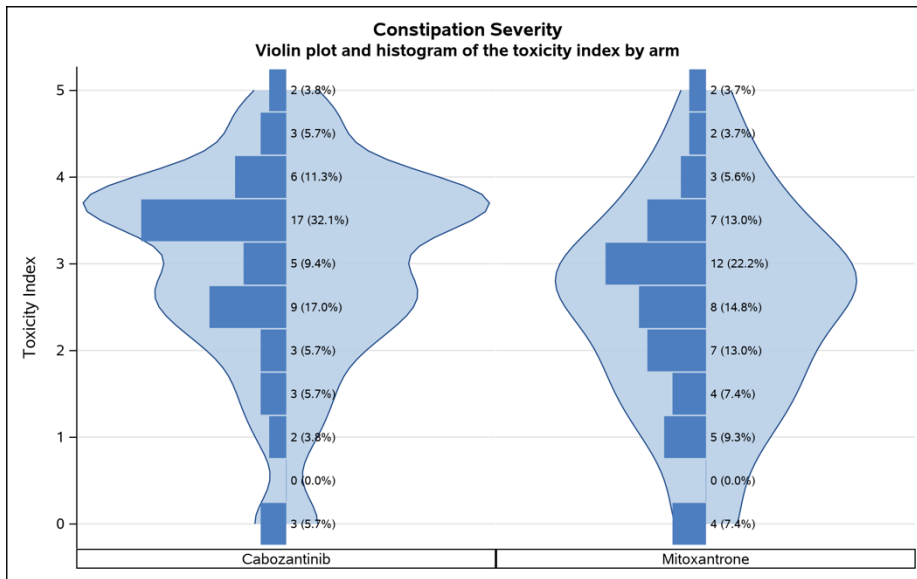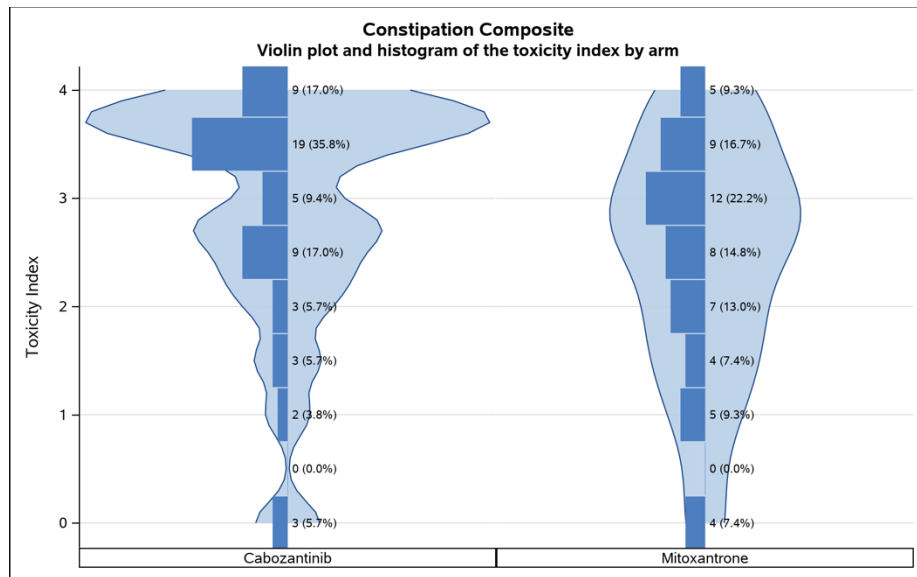

## Supplemental Figure 2. PRO-CTCAE Decreased Appetite Item Group

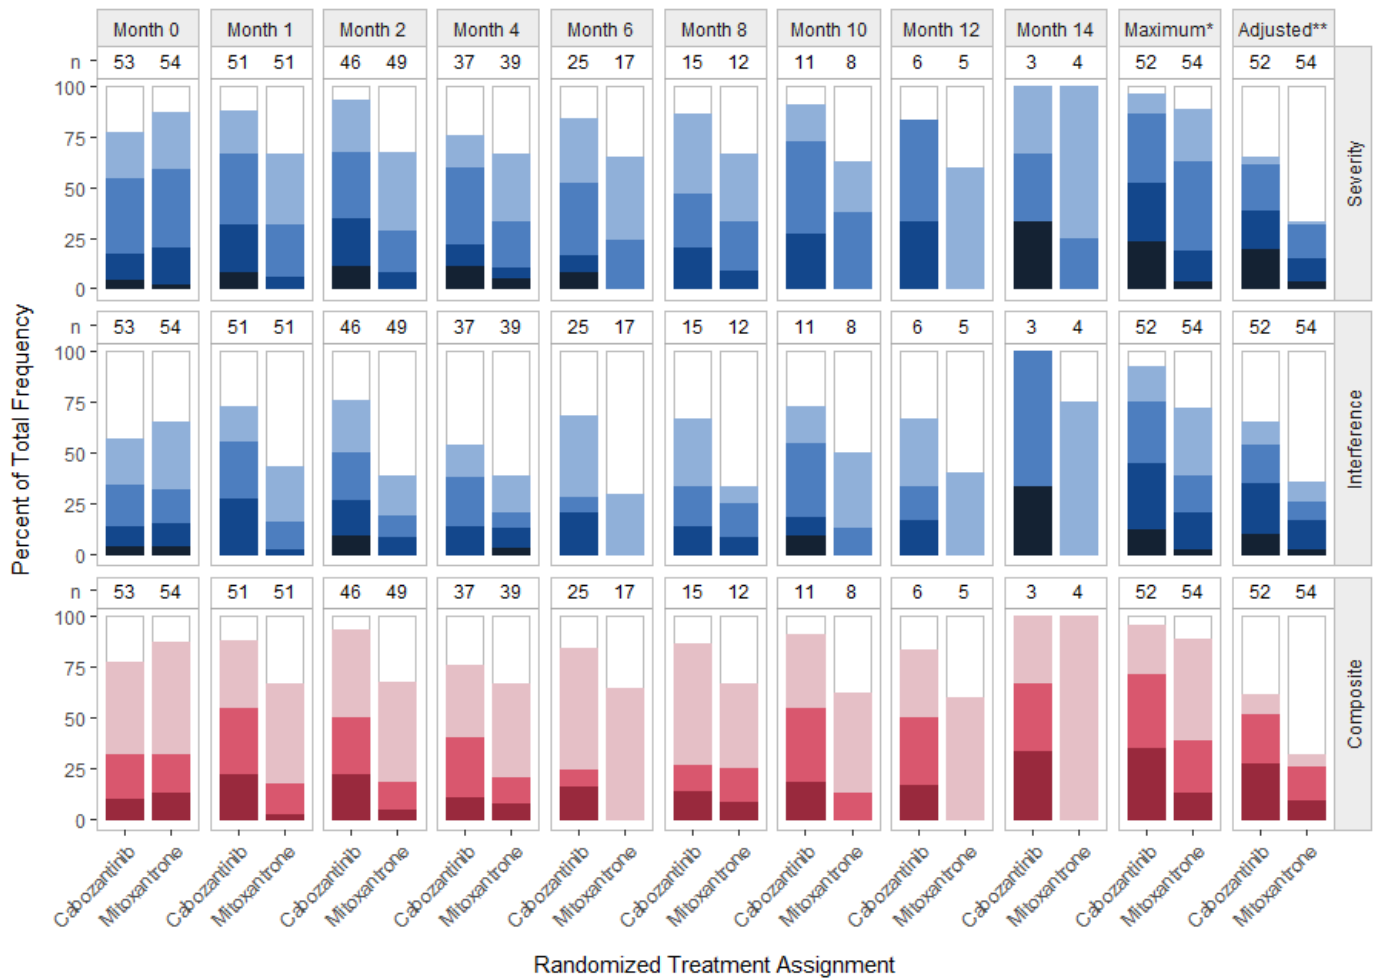

**Severity:** □ None / □ Mild / □ Moderate / □ Severe / □ Very severe

**Interference:** □ Not at all / □ A little bit / □ Somewhat / □ Quite a bit / □ Very much

**Composite Grade:** □ 0 / □ 1 / □ 2 / □ 3

Column labels (n) show the number of subjects with an observed symptom score or grade.

\*Maximum score or grade reported post-baseline per patient.

\*\*Maximum score or grade reported post-baseline per patient when including only scores that were worse than the patient's baseline score.

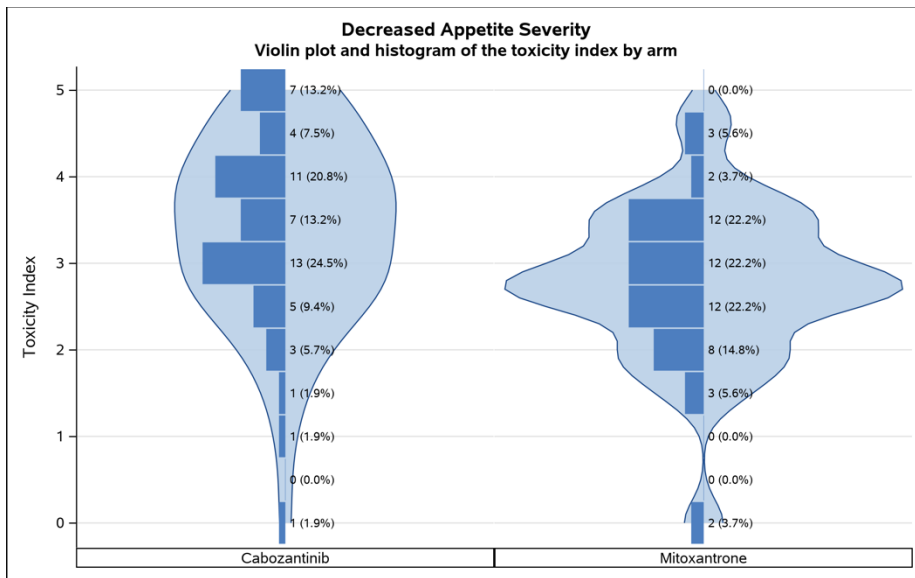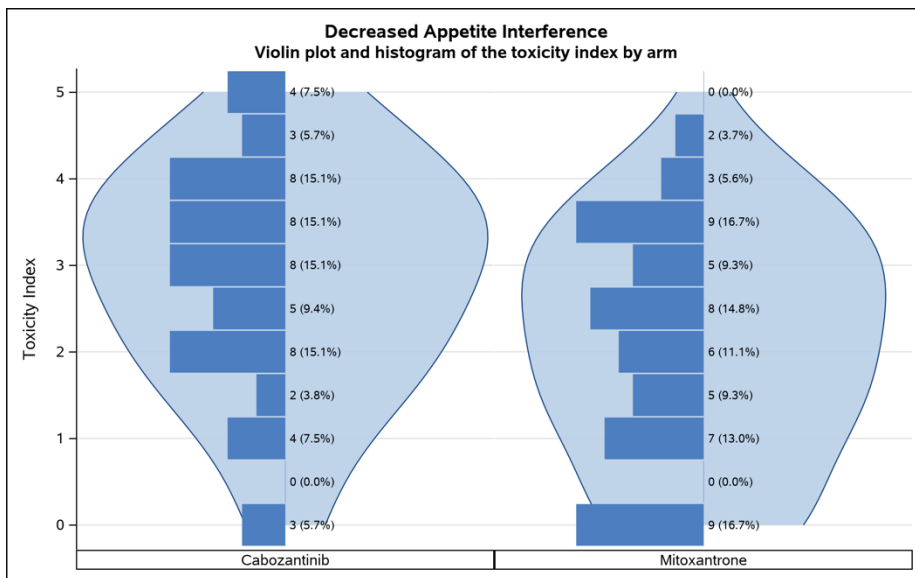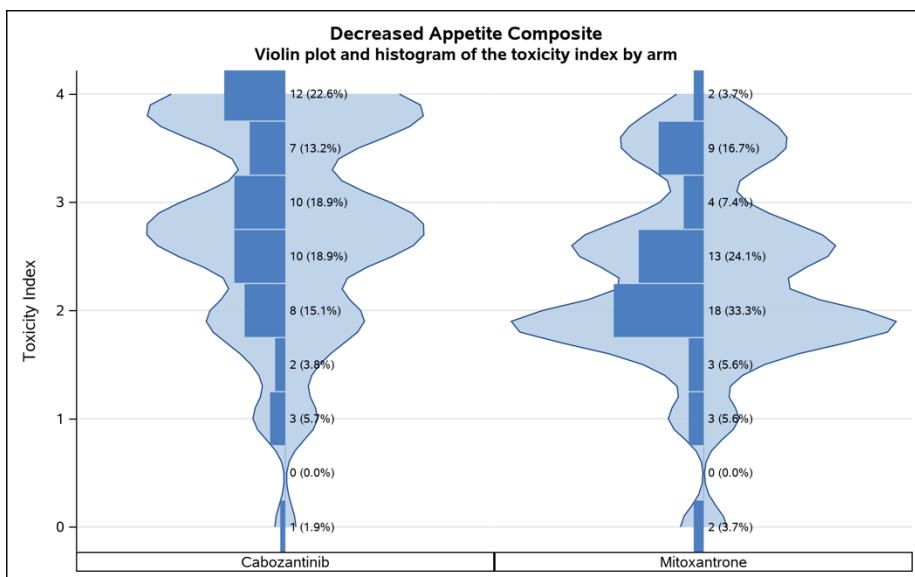

### Supplemental Figure 3. PRO-CTCAE Diarrhea Item Group

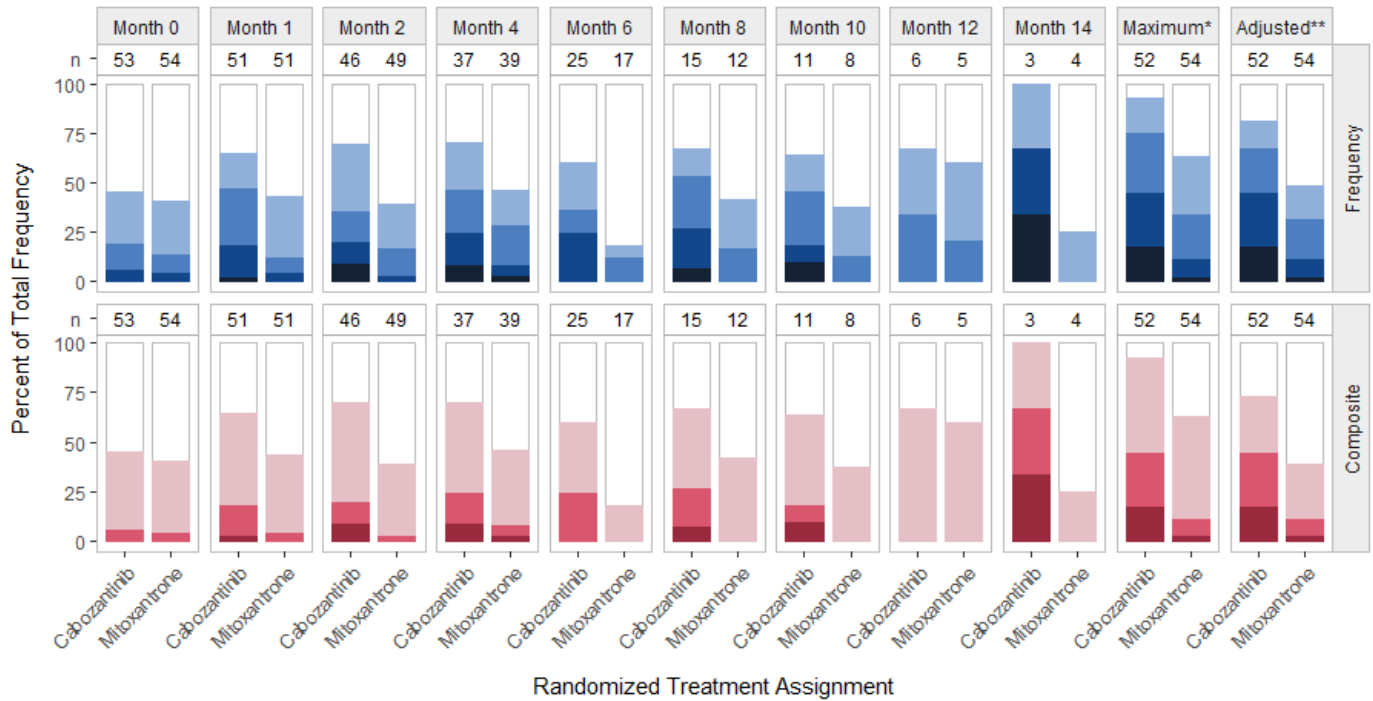

Frequency: □ Never / □ Rarely / □ Occasionally / □ Frequently / □ Almost constantly

Composite Grade: □ 0 / □ 1 / □ 2 / □ 3

Column labels (n) show the number of subjects with an observed symptom score or grade.

\*Maximum score or grade reported post-baseline per patient.

\*\*Maximum score or grade reported post-baseline per patient when including only scores that were worse than the patient's baseline score.

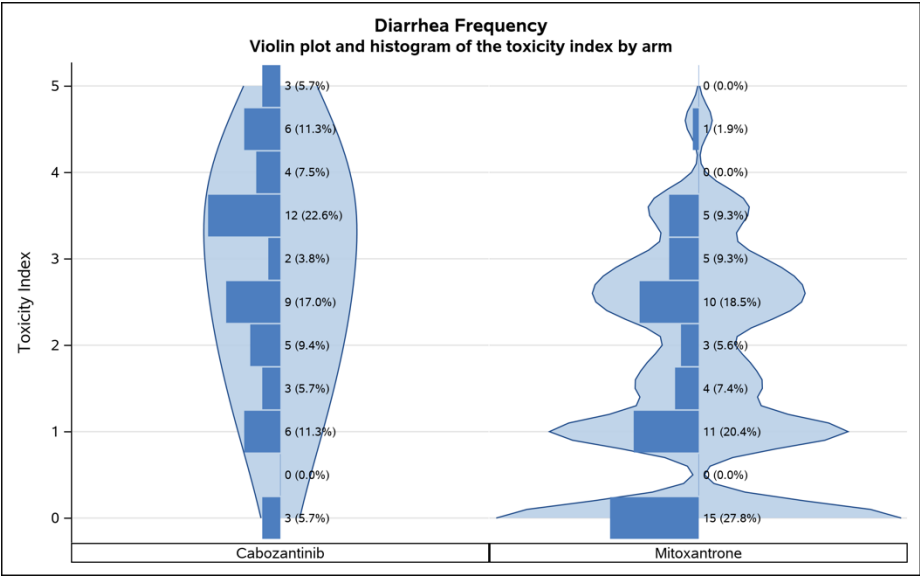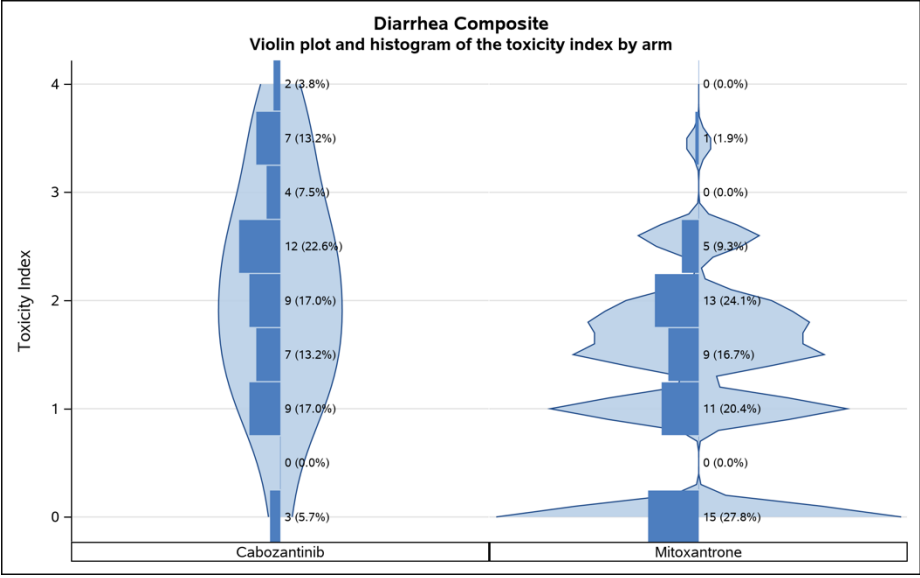

### Supplemental Figure 4. PRO-CTCAE Fatigue Item Group

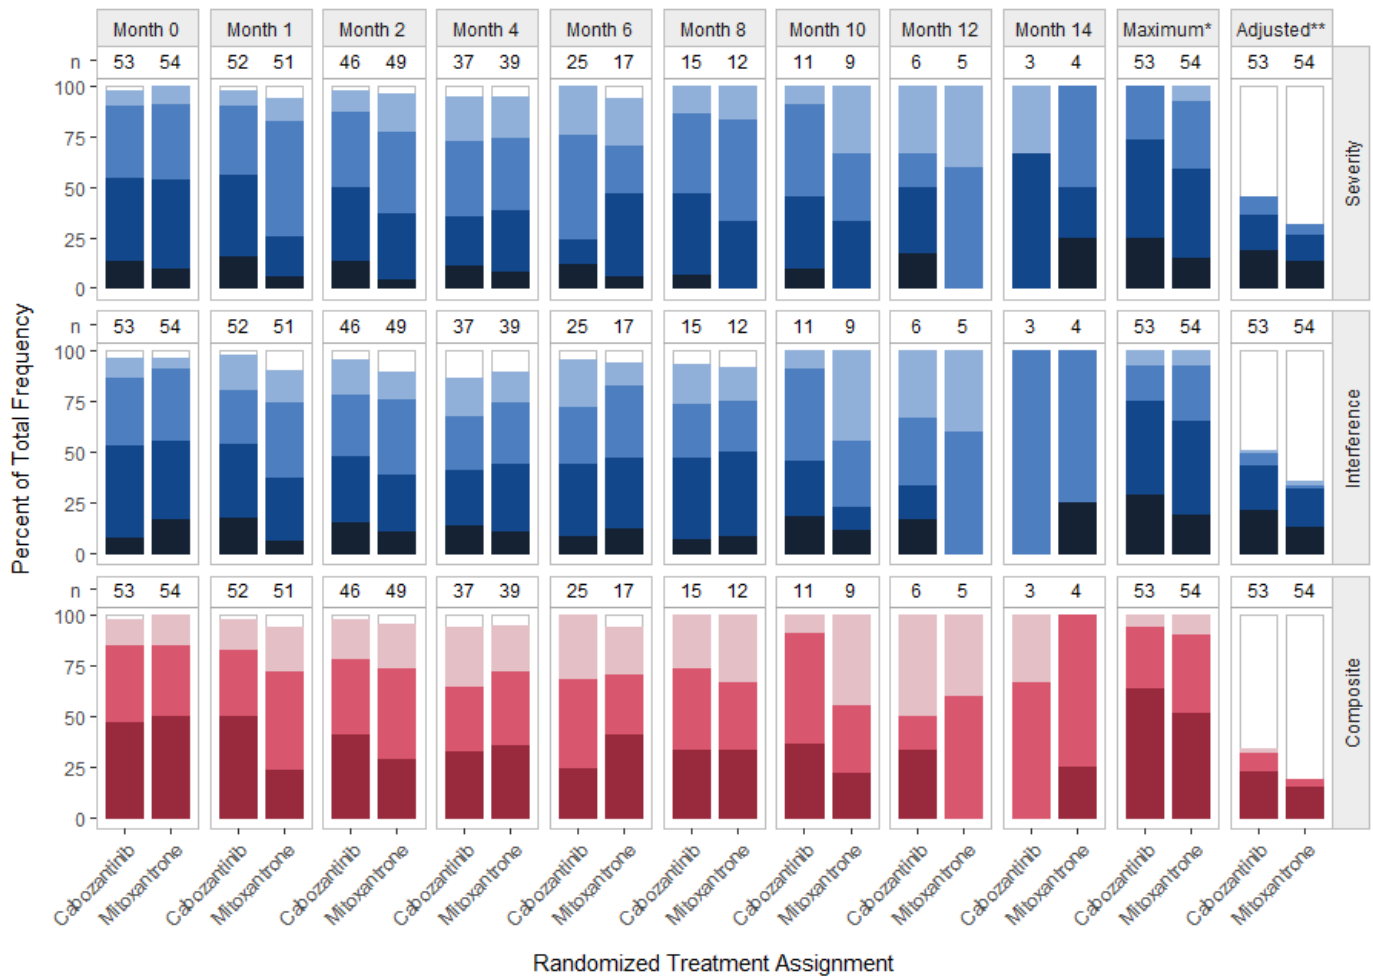

**Severity:** □ None / ■ Mild / ■ Moderate / ■ Severe / ■ Very severe

**Interference:** □ Not at all / ■ A little bit / ■ Somewhat / ■ Quite a bit / ■ Very much

**Composite Grade:** □ 0 / ■ 1 / ■ 2 / ■ 3

Column labels (n) show the number of subjects with an observed symptom score or grade.

\*Maximum score or grade reported post-baseline per patient.

\*\*Maximum score or grade reported post-baseline per patient when including only scores that were worse than the patient's baseline score.



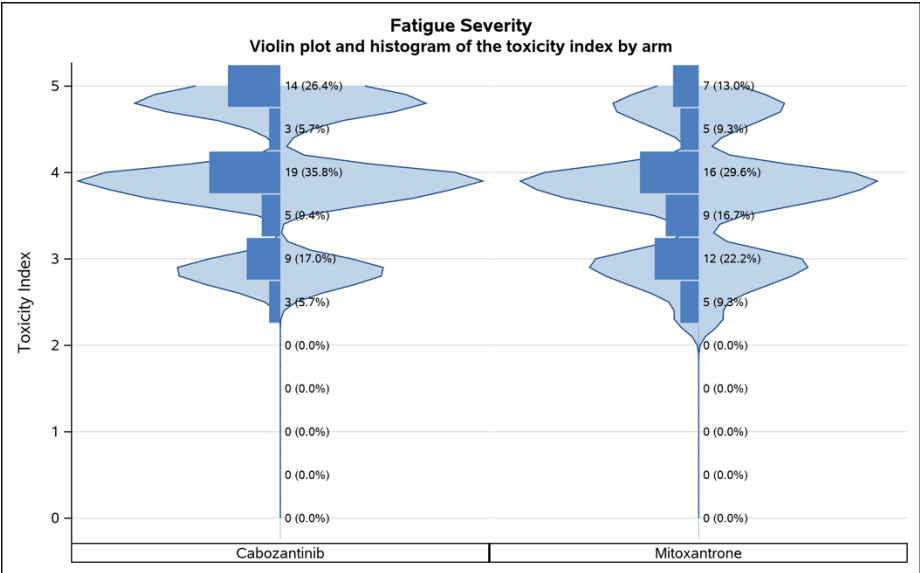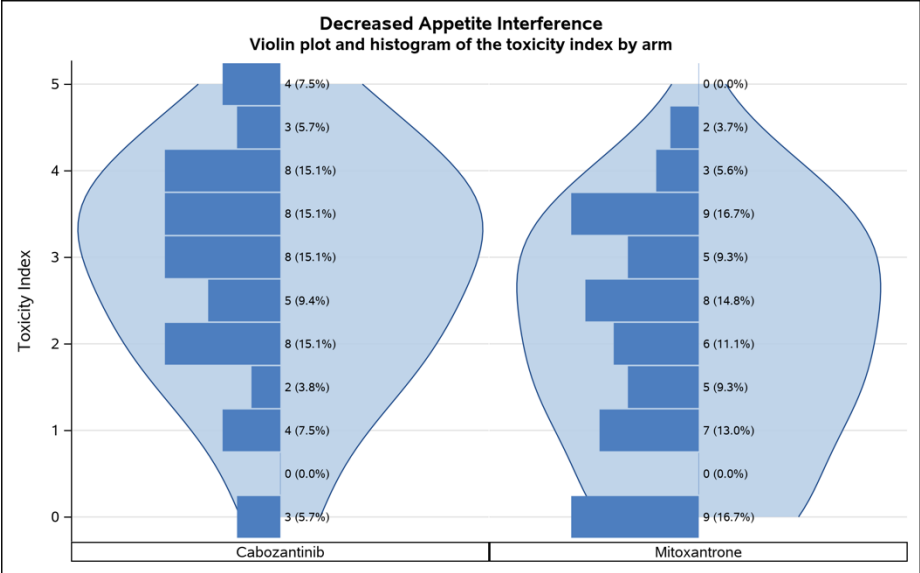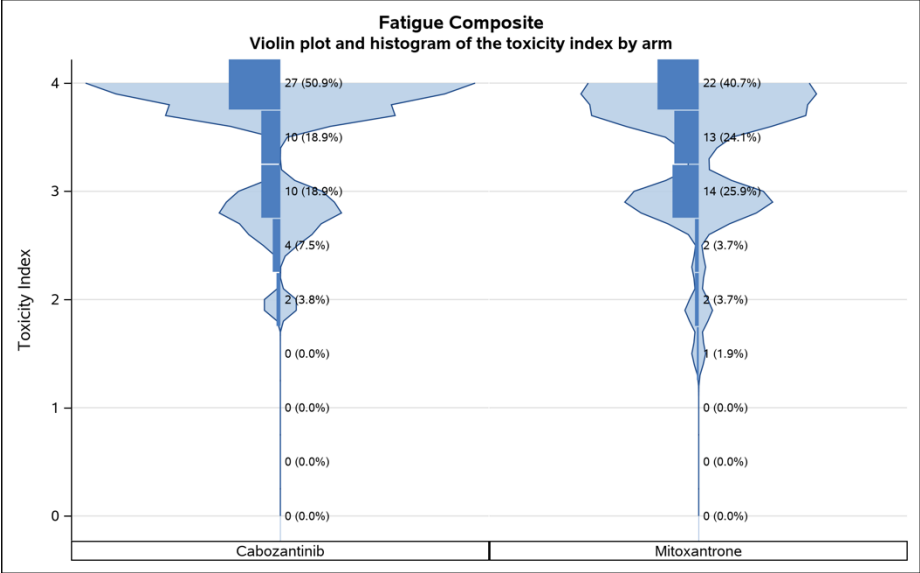

### Supplemental Figure 5. PRO-CTCAE Insomnia Item Group

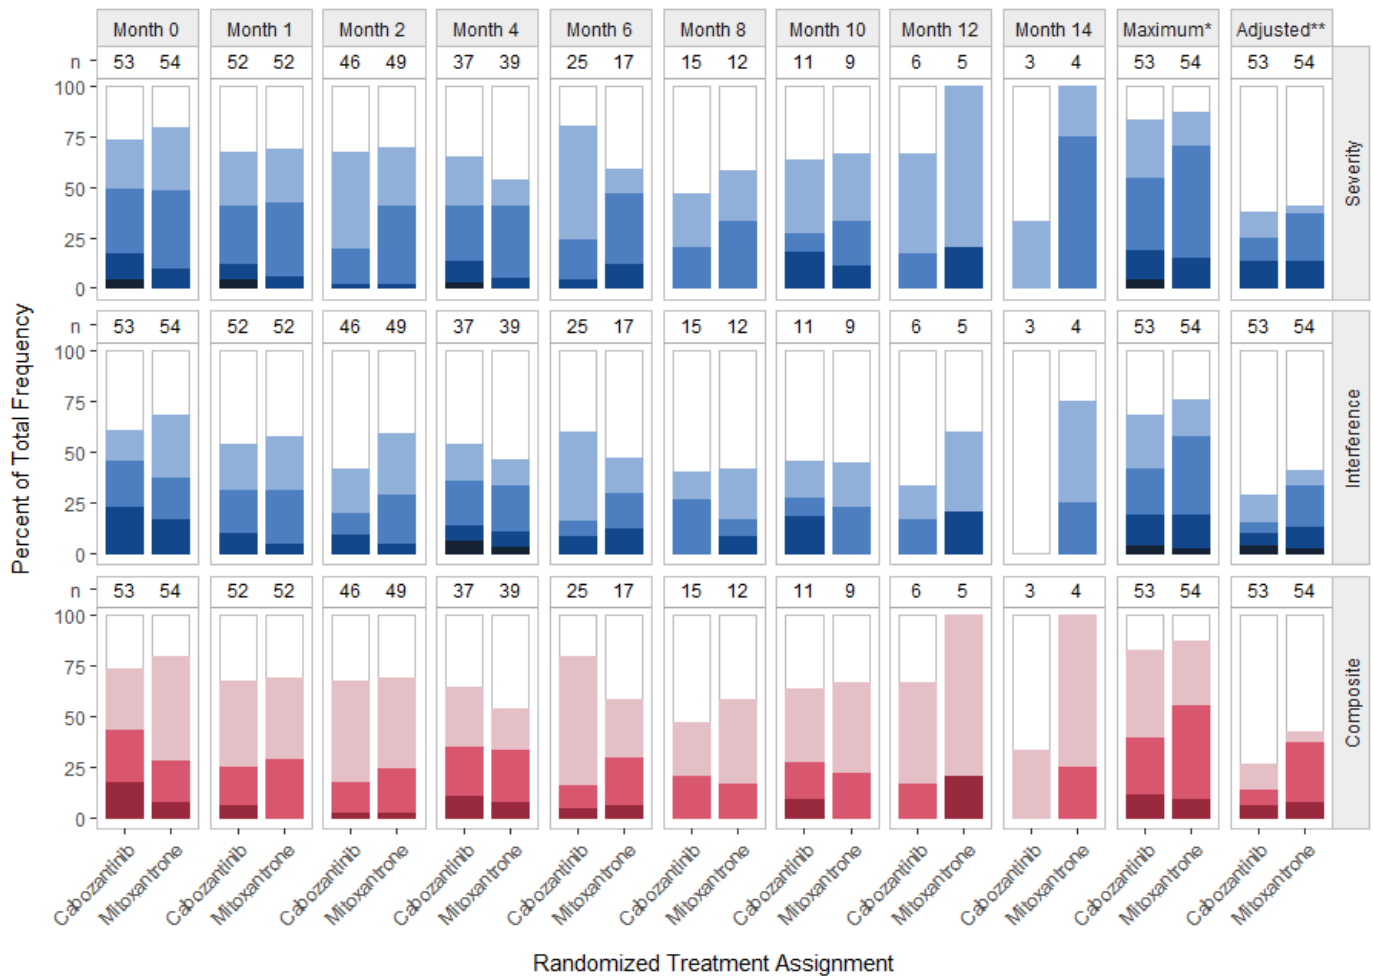

Severity: □ None / ■ Mild / ■ Moderate / ■ Severe / ■ Very severe

Interference: □ Not at all / ■ A little bit / ■ Somewhat / ■ Quite a bit / ■ Very much

Composite Grade: □ 0 / ■ 1 / ■ 2 / ■ 3

Column labels (n) show the number of subjects with an observed symptom score or grade.

\*Maximum score or grade reported post-baseline per patient.

\*\*Maximum score or grade reported post-baseline per patient when including only scores that were worse than the patient's baseline score.

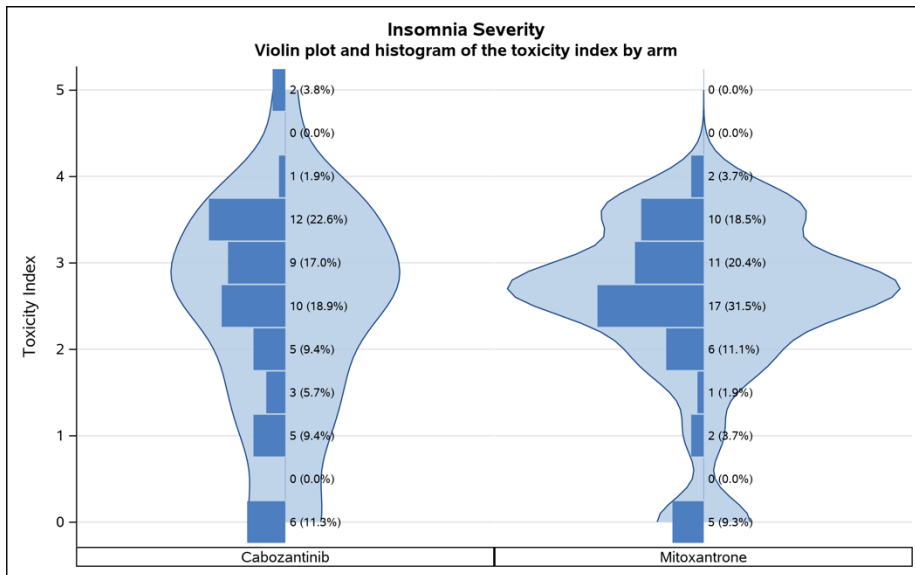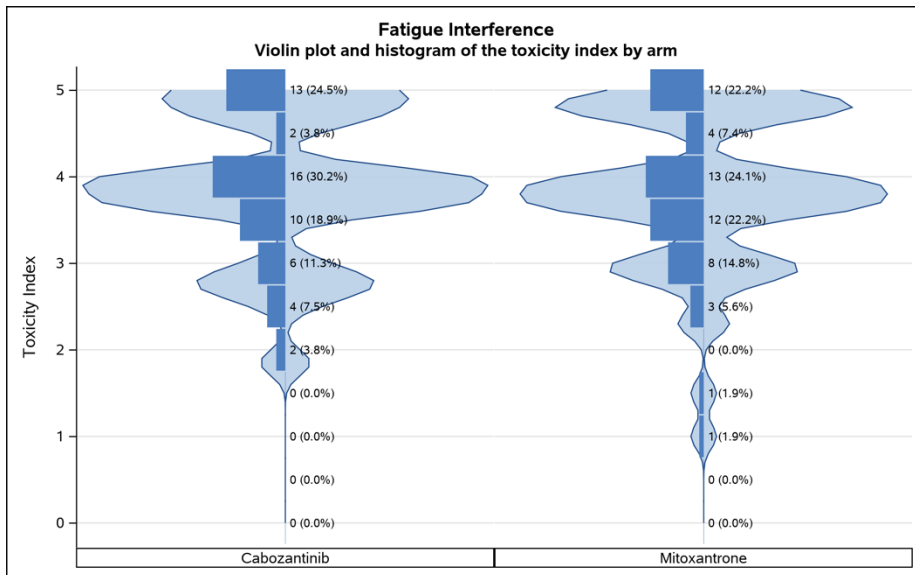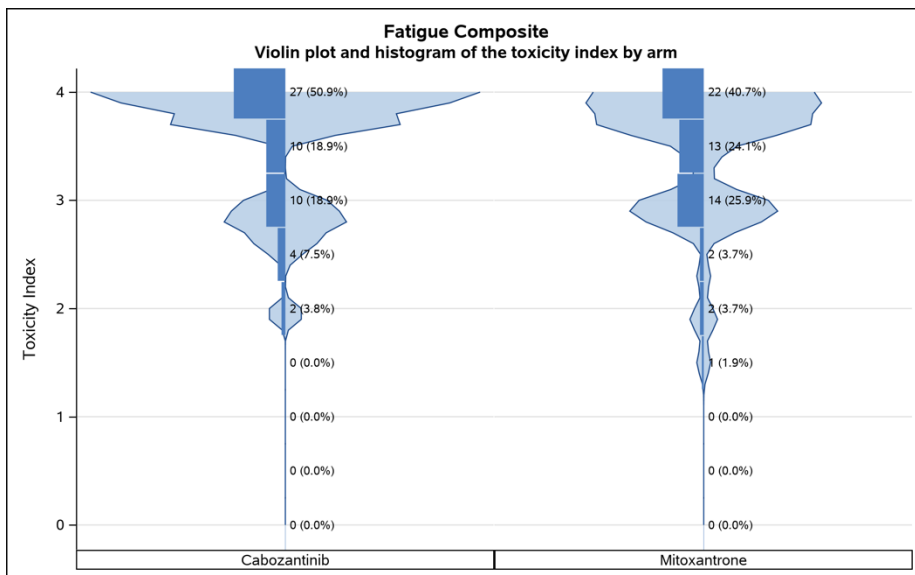

### Supplemental Figure 6. PRO-CTCAE Nausea Item Group

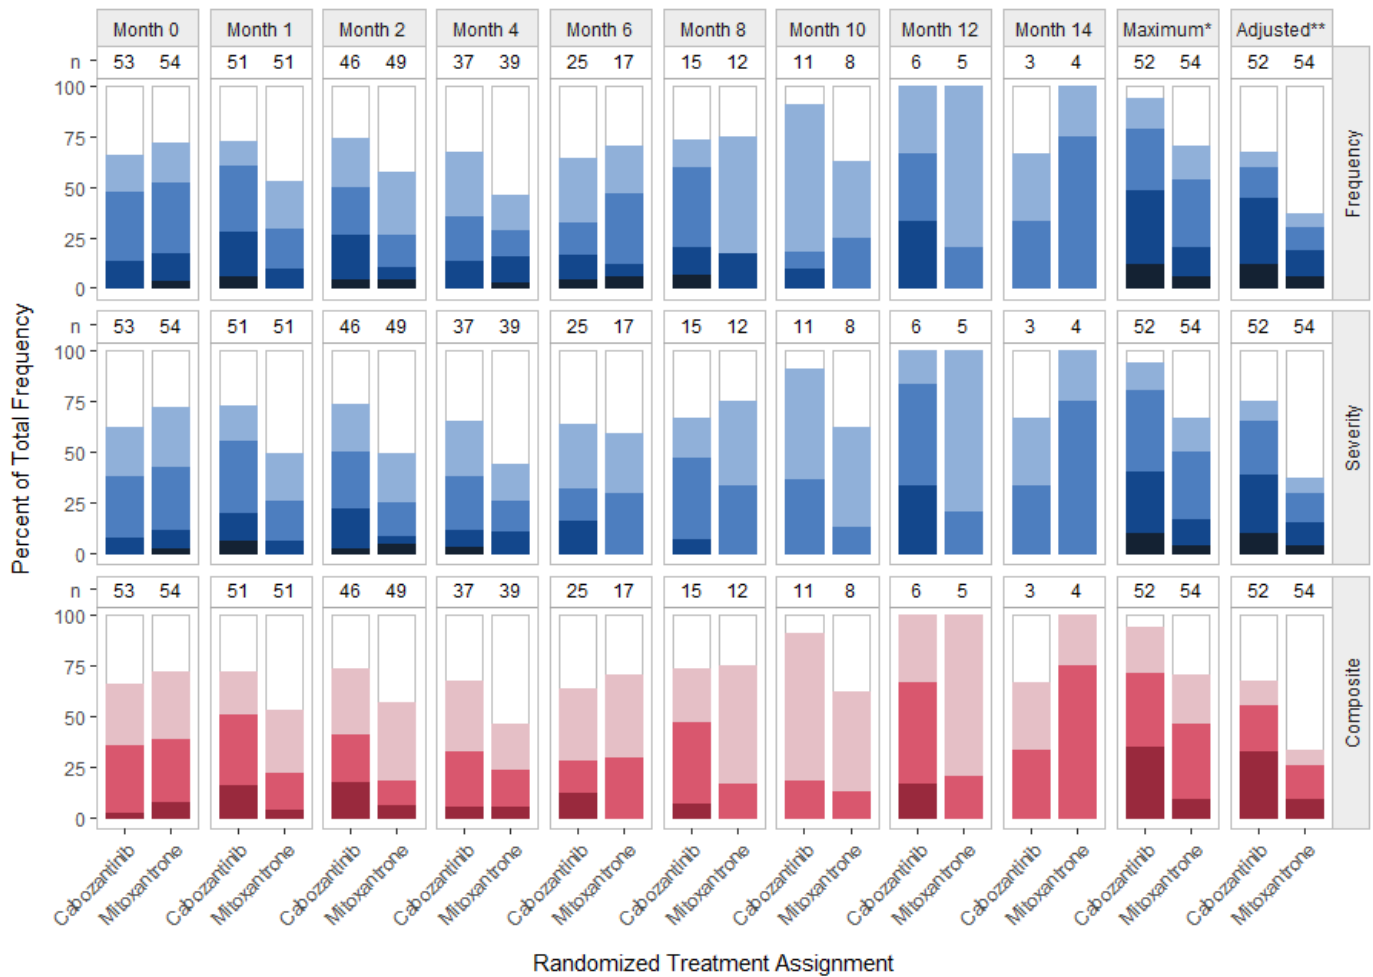

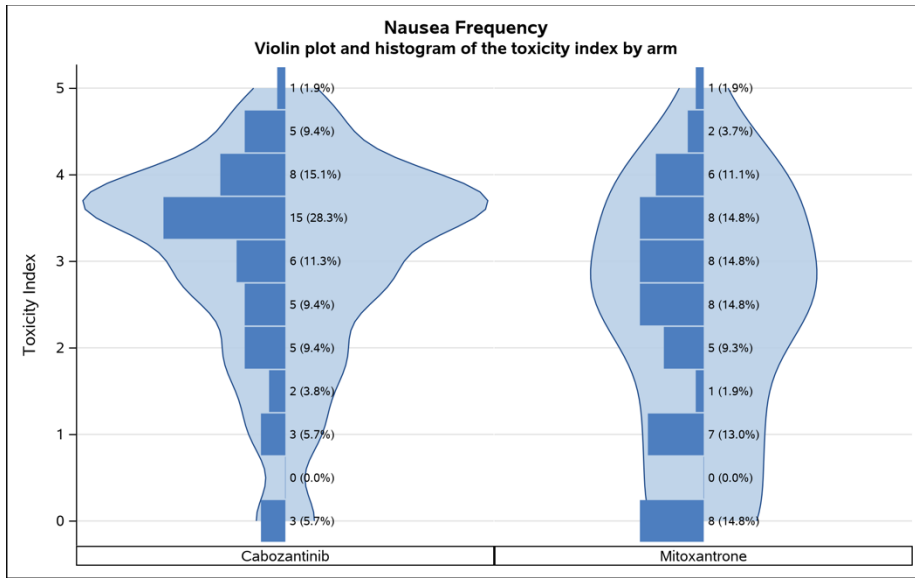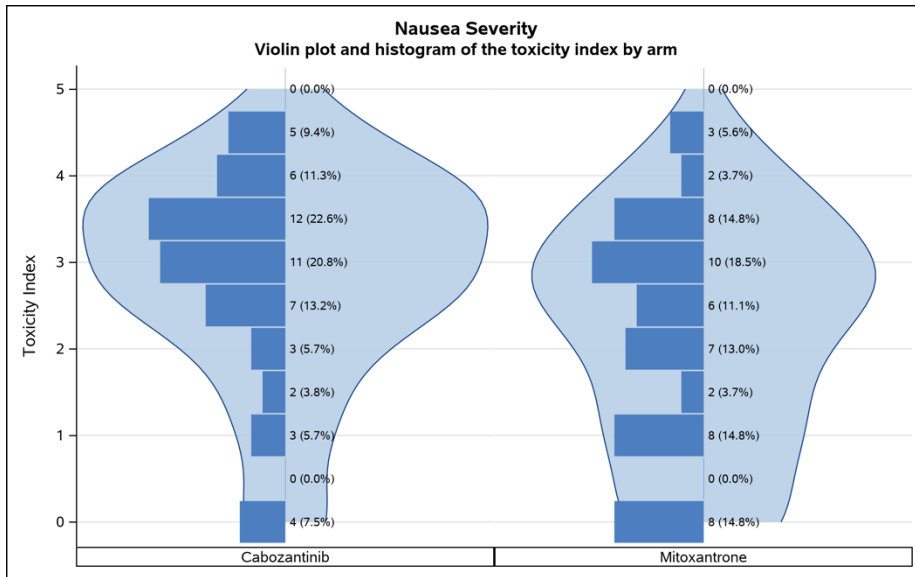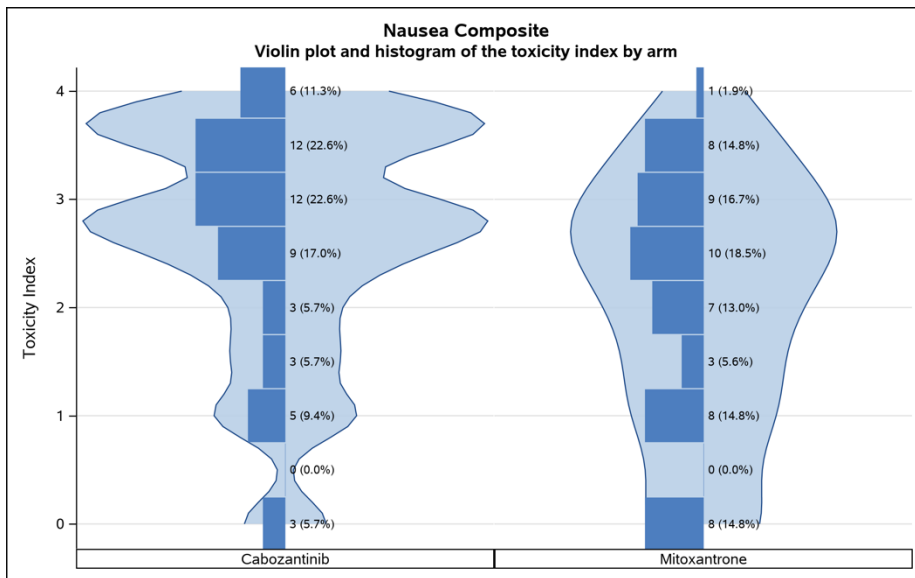

### Supplemental Figure 7. PRO-CTCAE Numbness/Tingling in Hands/Feet Item Group

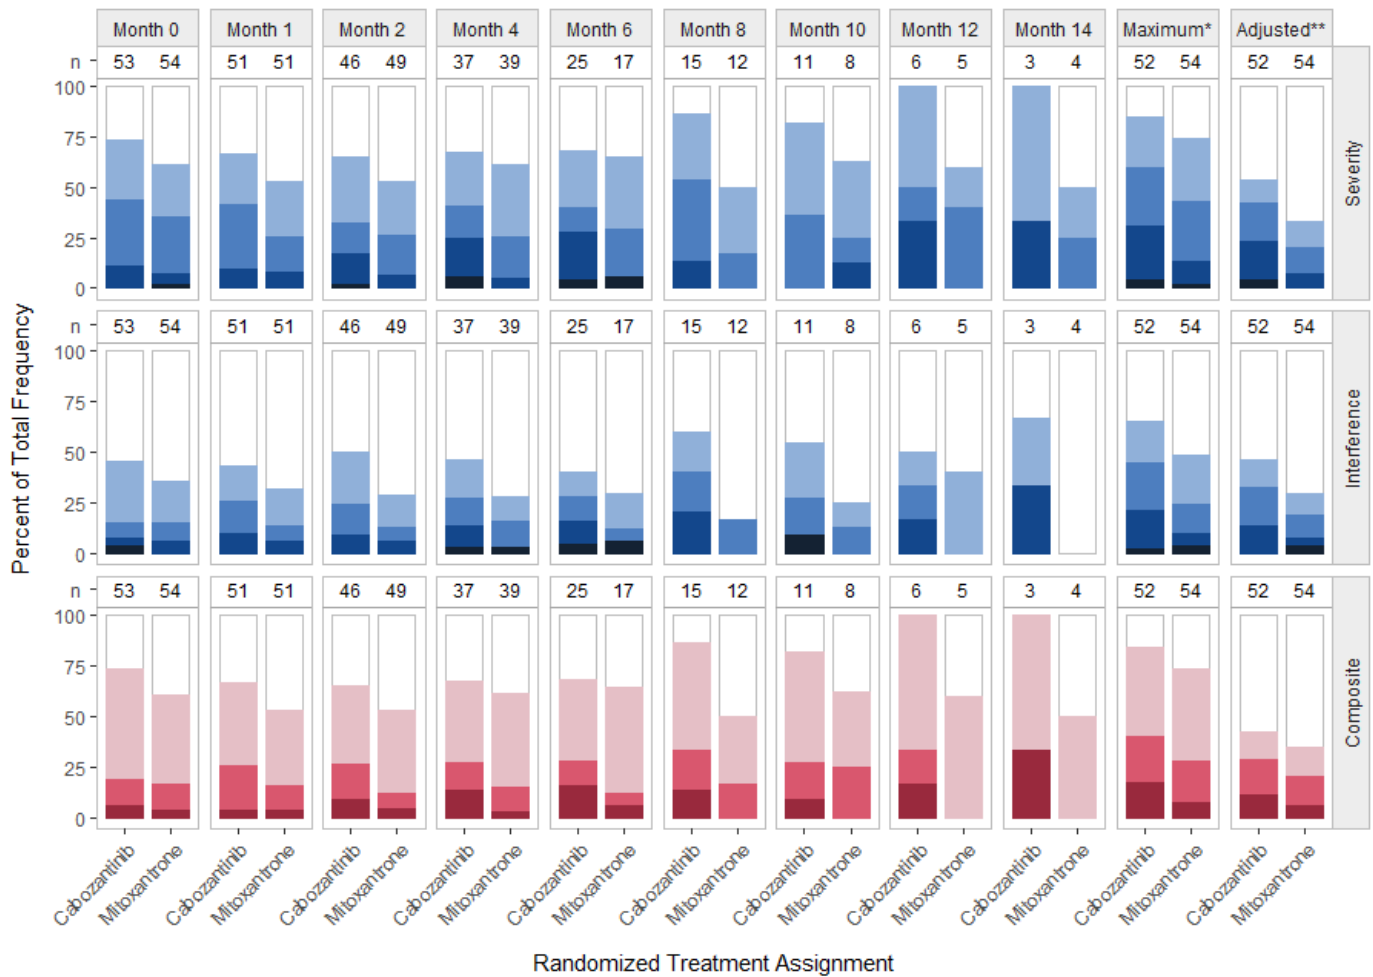

Severity: □ None / ■ Mild / ■ Moderate / ■ Severe / ■ Very severe

Interference: □ Not at all / ■ A little bit / ■ Somewhat / ■ Quite a bit / ■ Very much

Composite Grade: □ 0 / ■ 1 / ■ 2 / ■ 3

Column labels (n) show the number of subjects with an observed symptom score or grade.

\*Maximum score or grade reported post-baseline per patient.

\*\*Maximum score or grade reported post-baseline per patient when including only scores that were worse than the patient's baseline score.

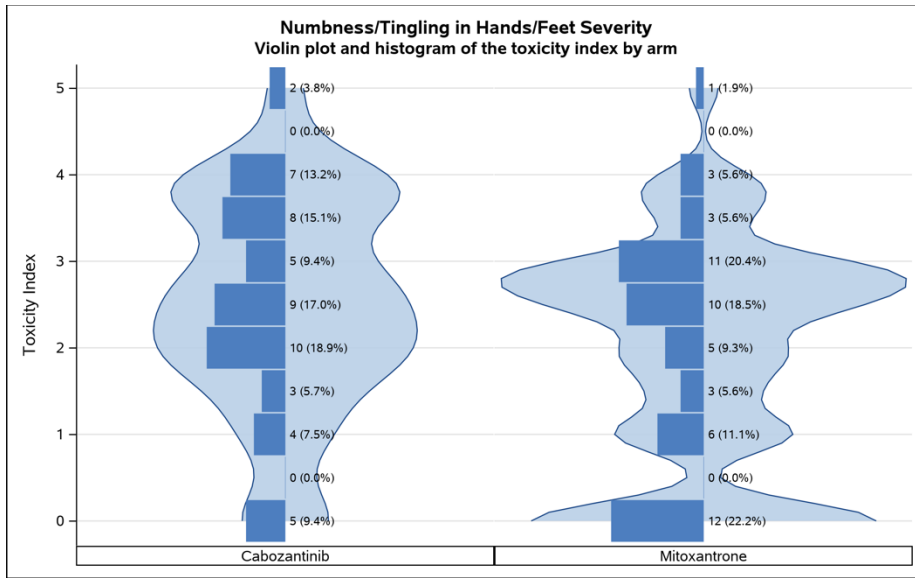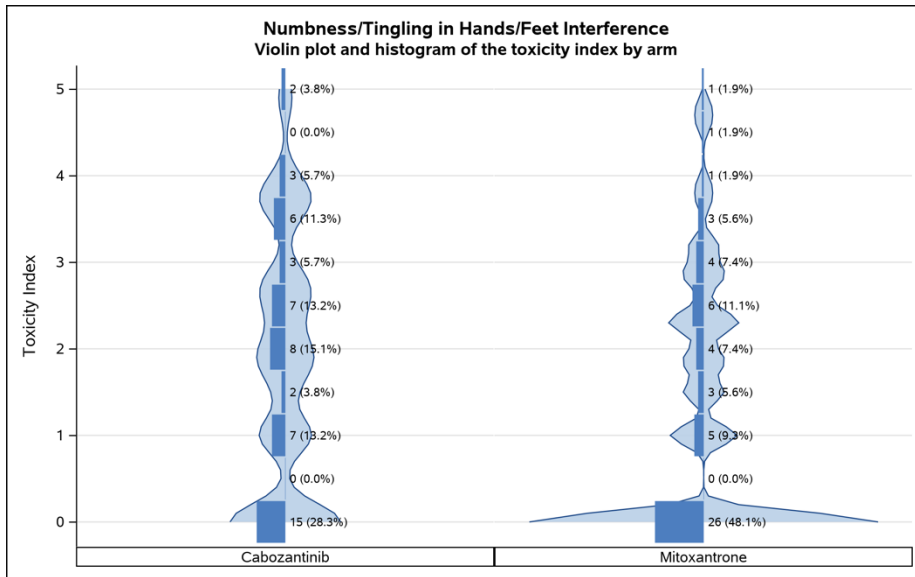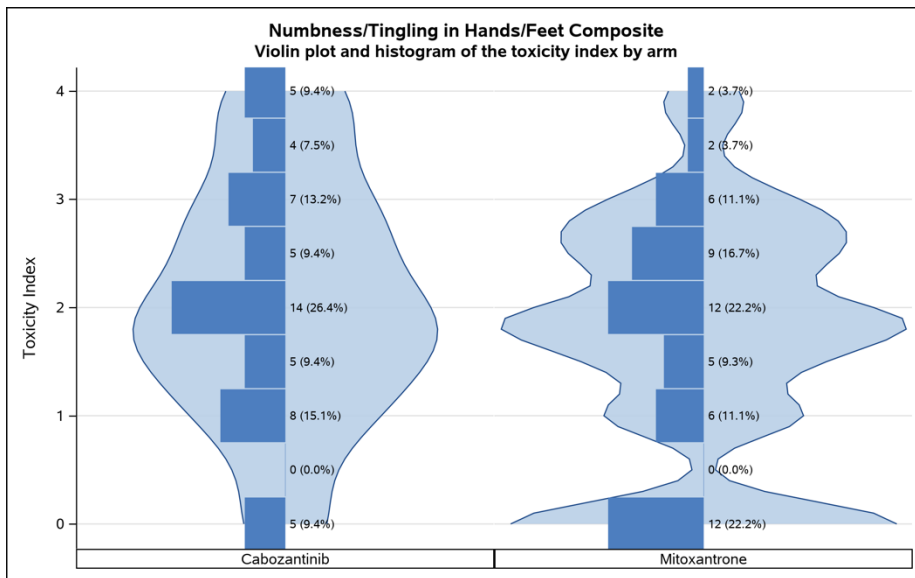

**Supplemental Figure 8. PRO-CTCAE Pain Item Group**

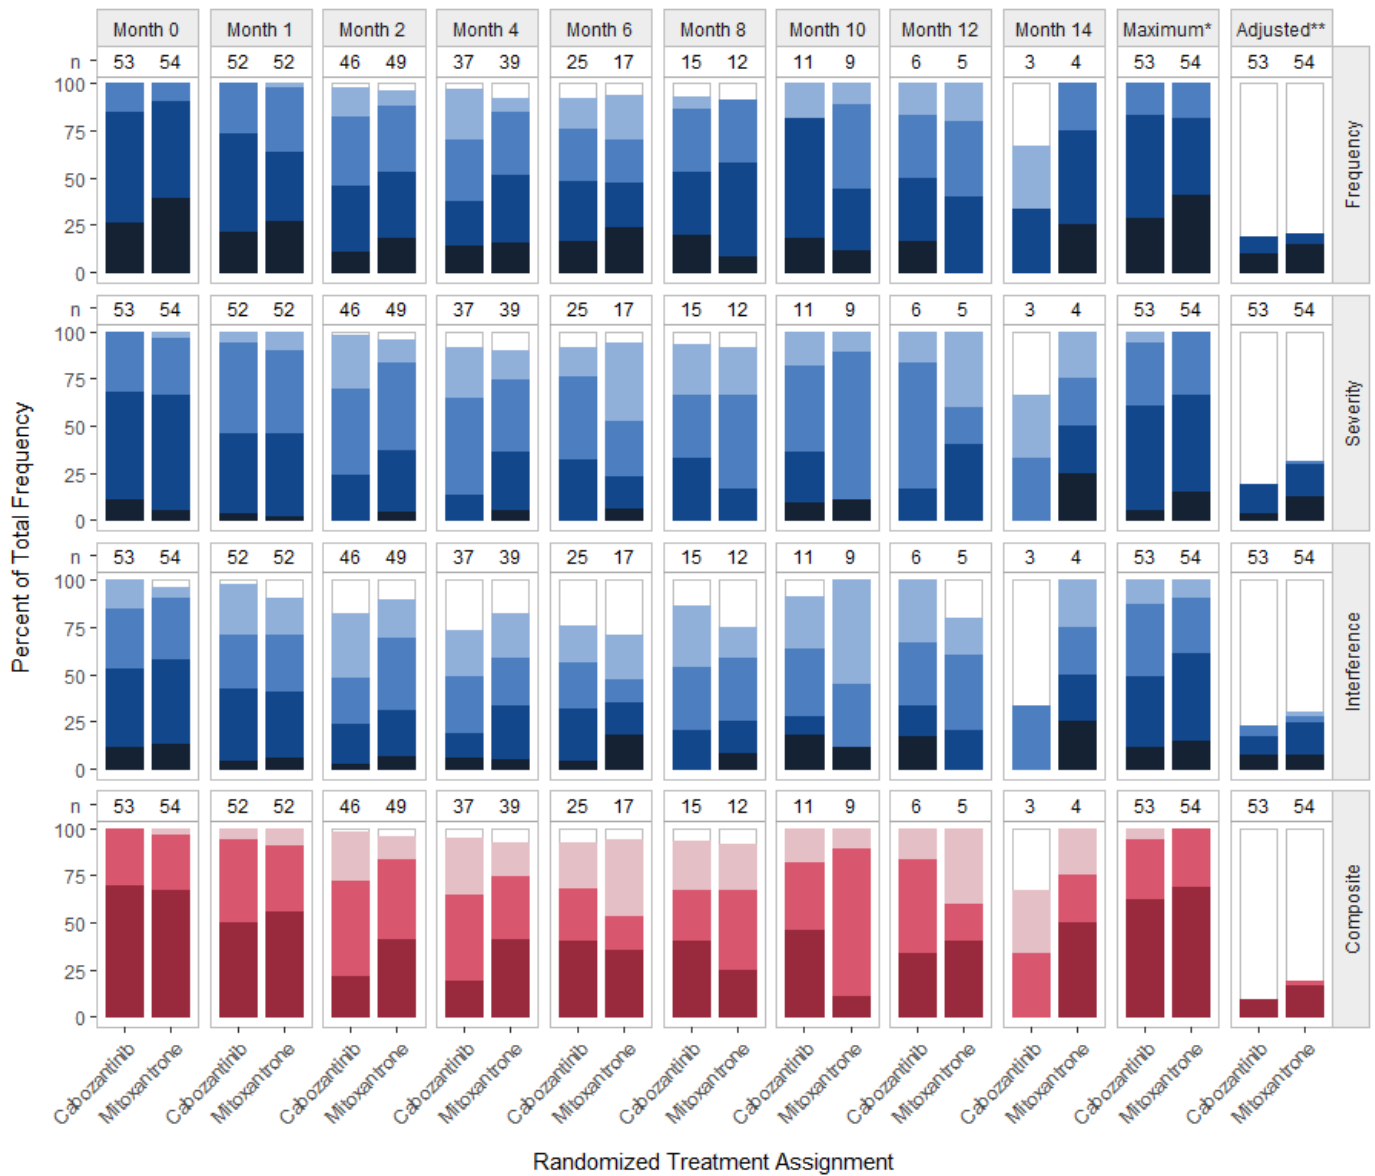

**Frequency:** □ Never / □ Rarely / □ Occasionally / □ Frequently / □ Almost constantly

**Severity:** □ None / □ Mild / □ Moderate / □ Severe / □ Very severe

**Interference:** □ Not at all / □ A little bit / □ Somewhat / □ Quite a bit / □ Very much

**Composite Grade:** □ 0 / □ 1 / □ 2 / □ 3

Column labels (n) show the number of subjects with an observed symptom score or grade.

\*Maximum score or grade reported post-baseline per patient.

\*\*Maximum score or grade reported post-baseline per patient when including only scores that were worse than the patient's baseline score.



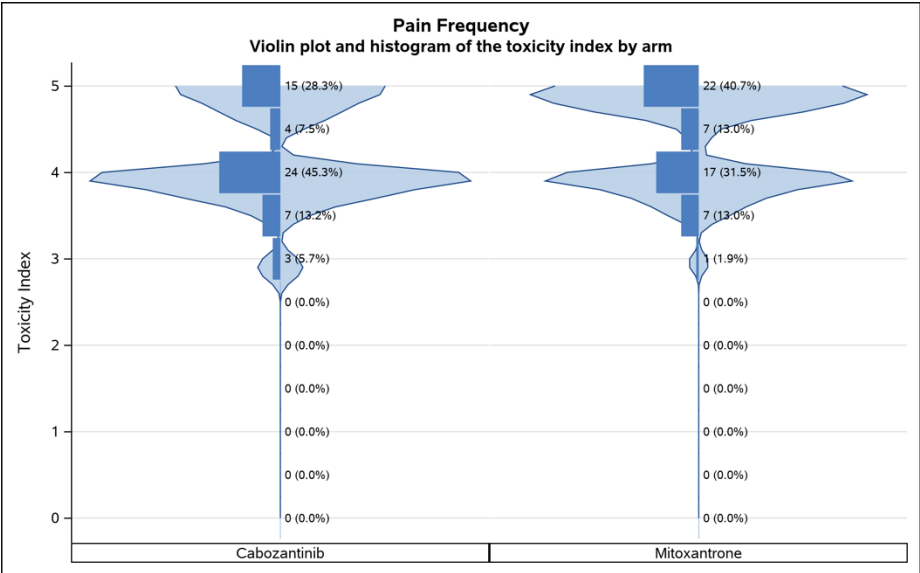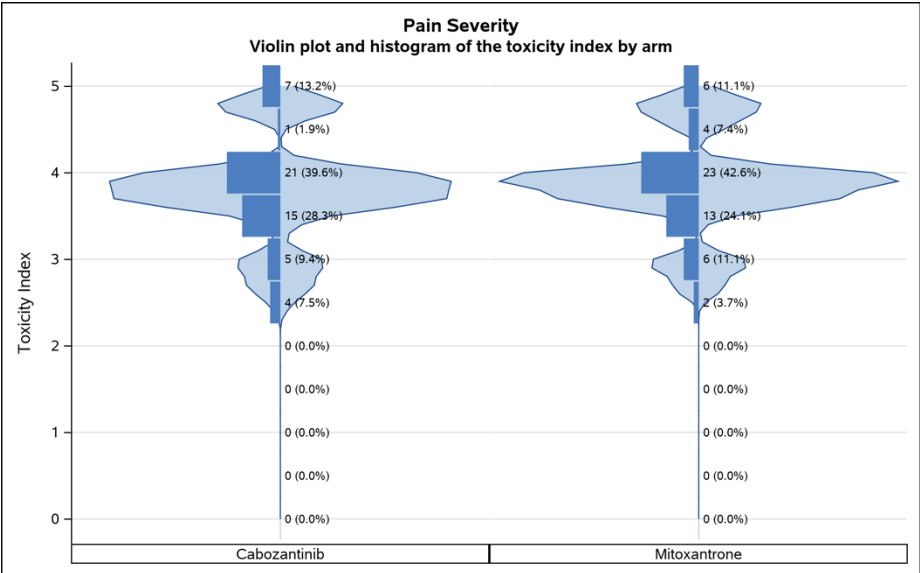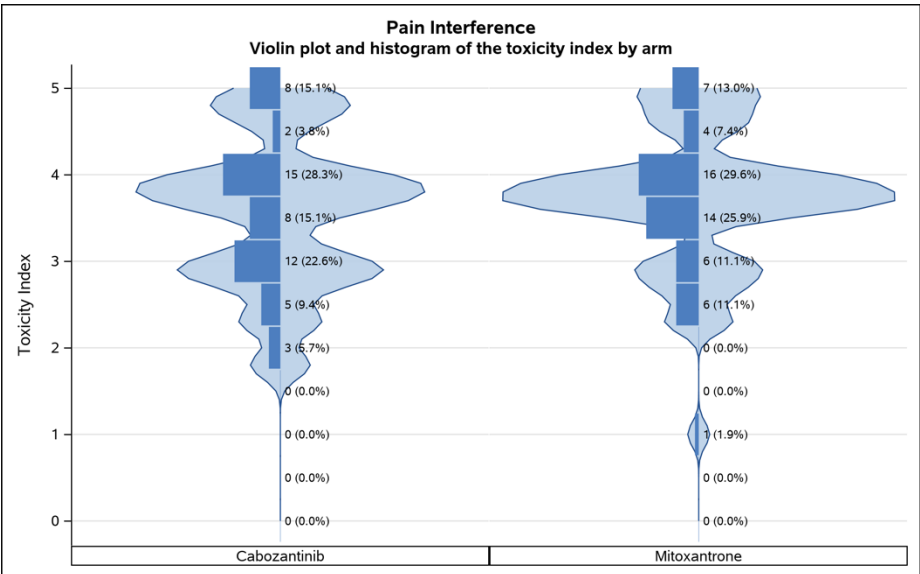

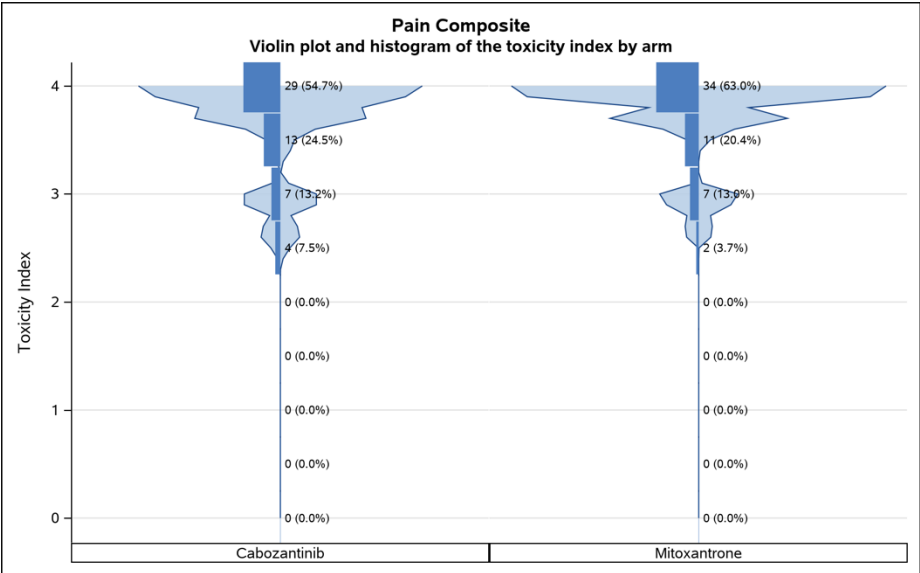

### Supplemental Figure 9. PRO-CTCAE Shortness of Breath Item Group

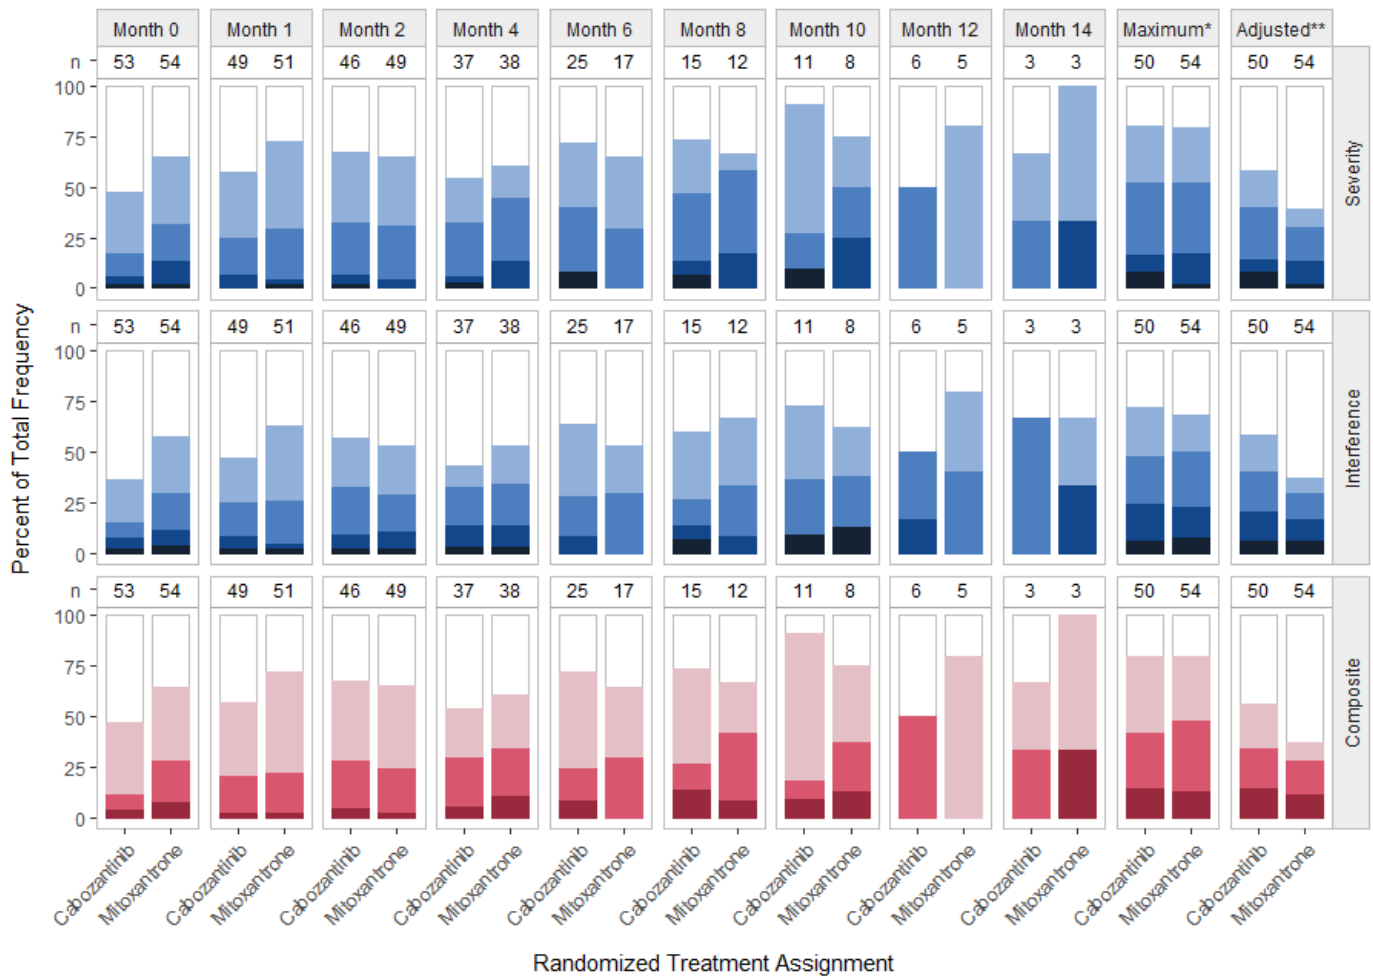

**Severity:** □ None / ■ Mild / ■ Moderate / ■ Severe / ■ Very severe

**Interference:** □ Not at all / ■ A little bit / ■ Somewhat / ■ Quite a bit / ■ Very much

**Composite Grade:** □ 0 / ■ 1 / ■ 2 / ■ 3

Column labels (n) show the number of subjects with an observed symptom score or grade.

\*Maximum score or grade reported post-baseline per patient.

\*\*Maximum score or grade reported post-baseline per patient when including only scores that were worse than the patient's baseline score.

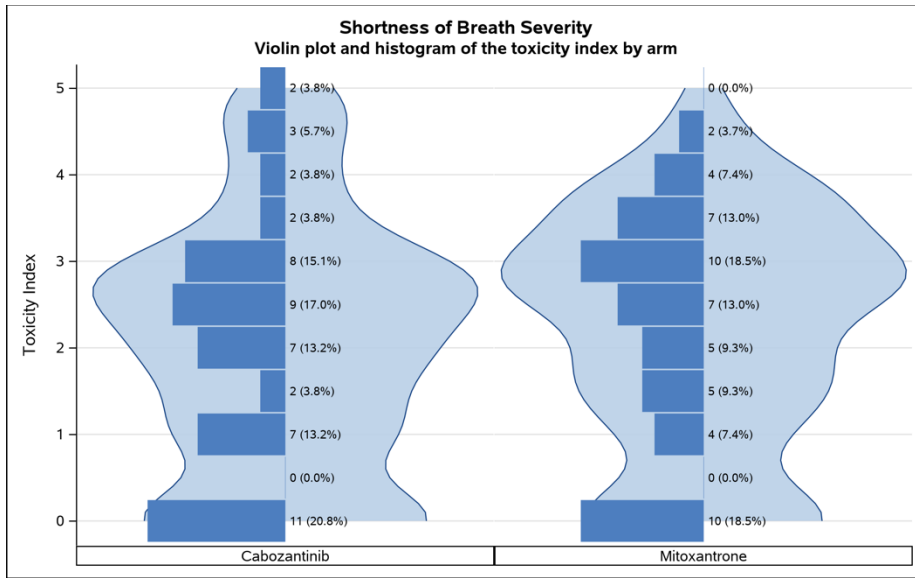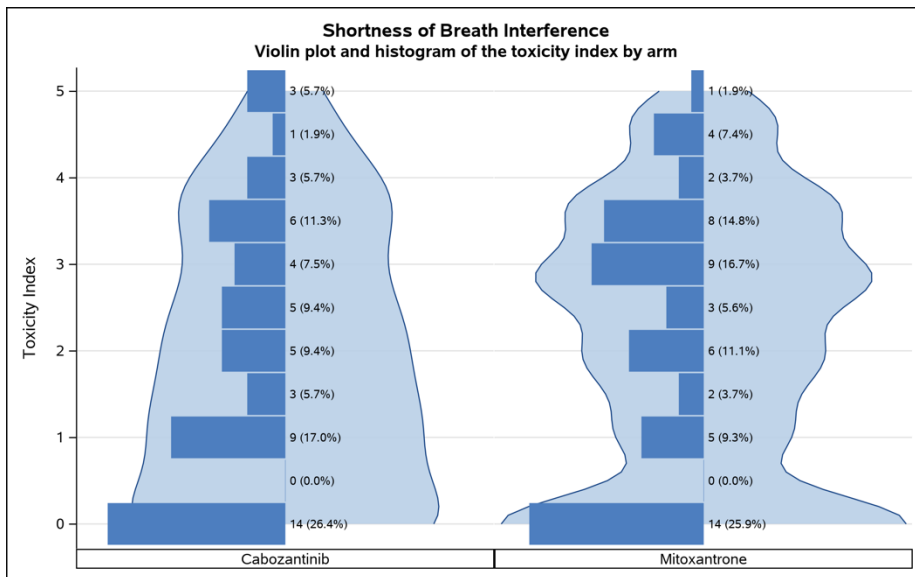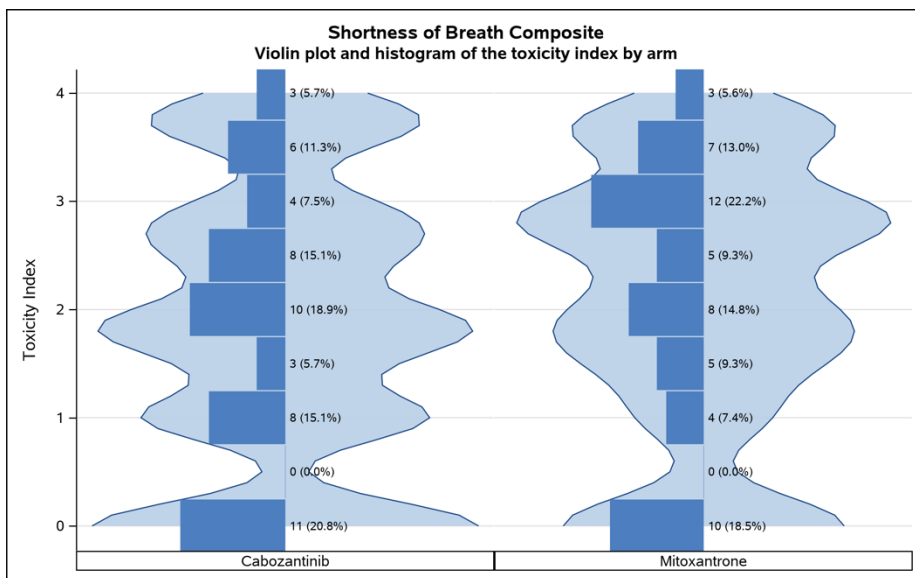

### Supplemental Figure 10. PRO-CTCAE Vomiting Item Group

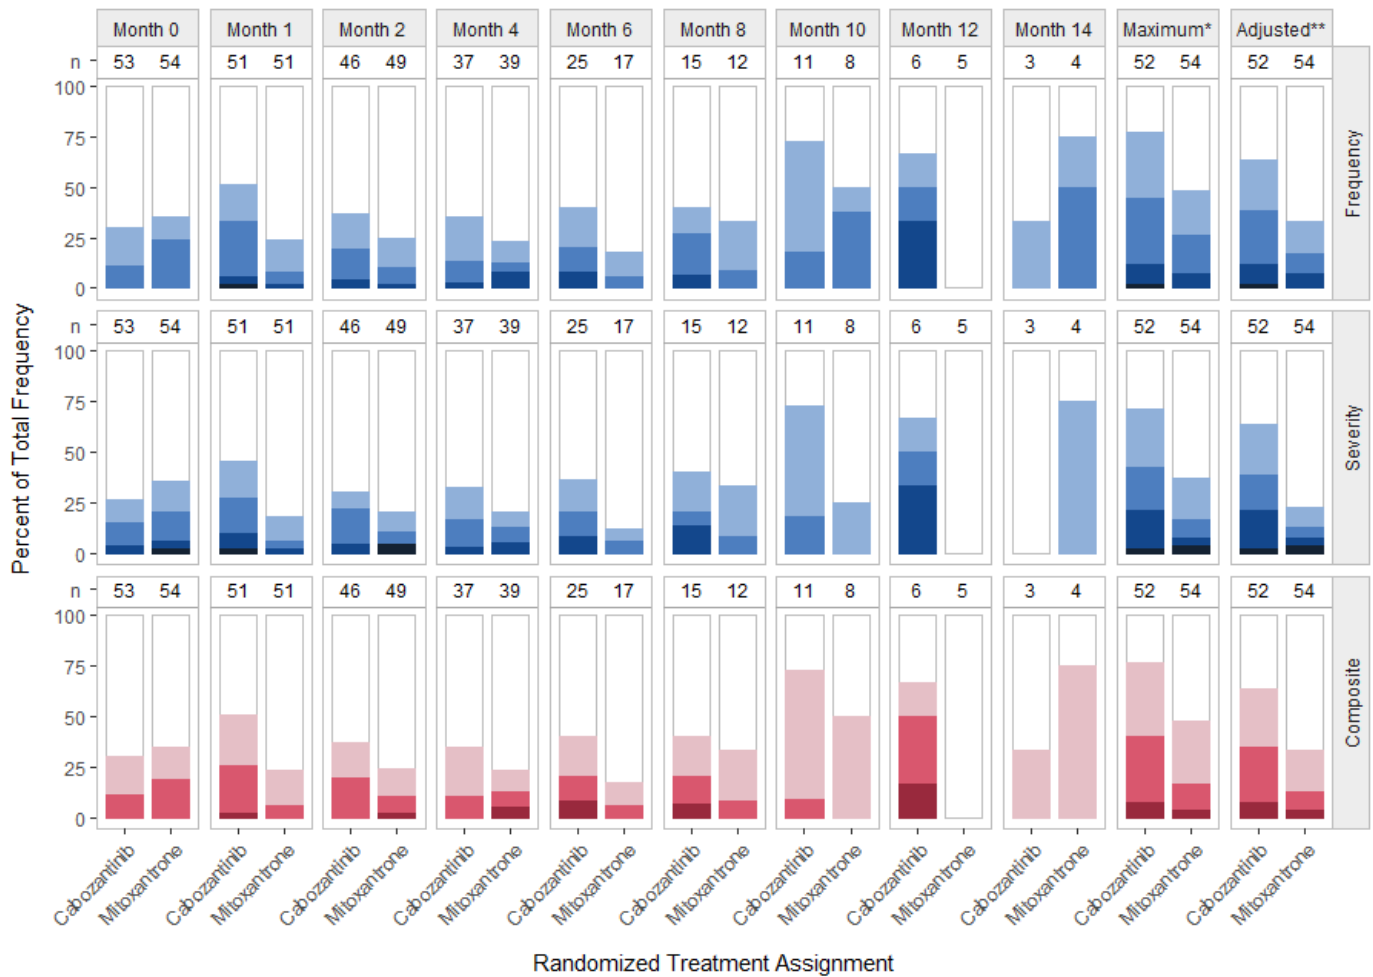

**Frequency:** □ Never / ■ Rarely / ■ Occasionally / ■ Frequently / ■ Almost constantly

**Severity:** □ None / ■ Mild / ■ Moderate / ■ Severe / ■ Very severe

**Composite Grade:** □ 0 / ■ 1 / ■ 2 / ■ 3

Column labels (n) show the number of subjects with an observed symptom score or grade.

\*Maximum score or grade reported post-baseline per patient.

\*\*Maximum score or grade reported post-baseline per patient when including only scores that were worse than the patient's baseline score.

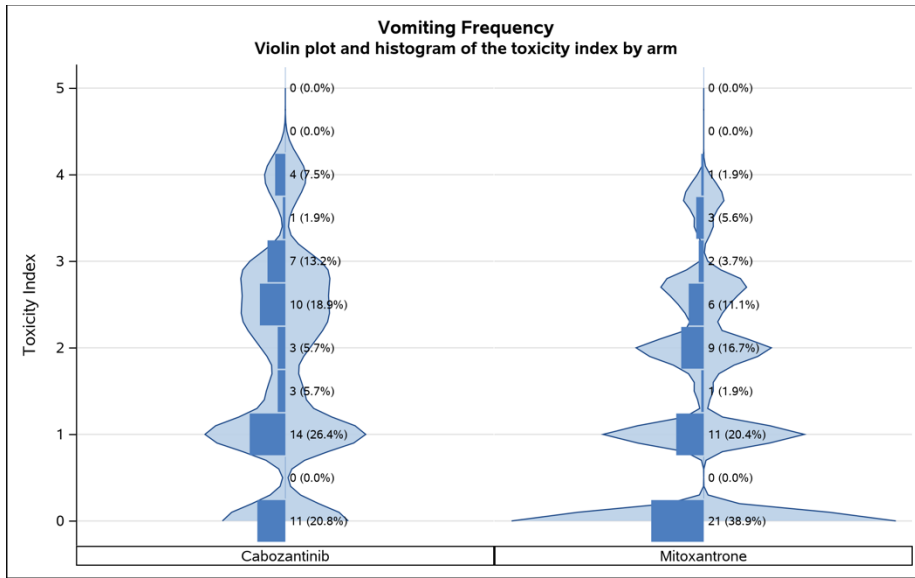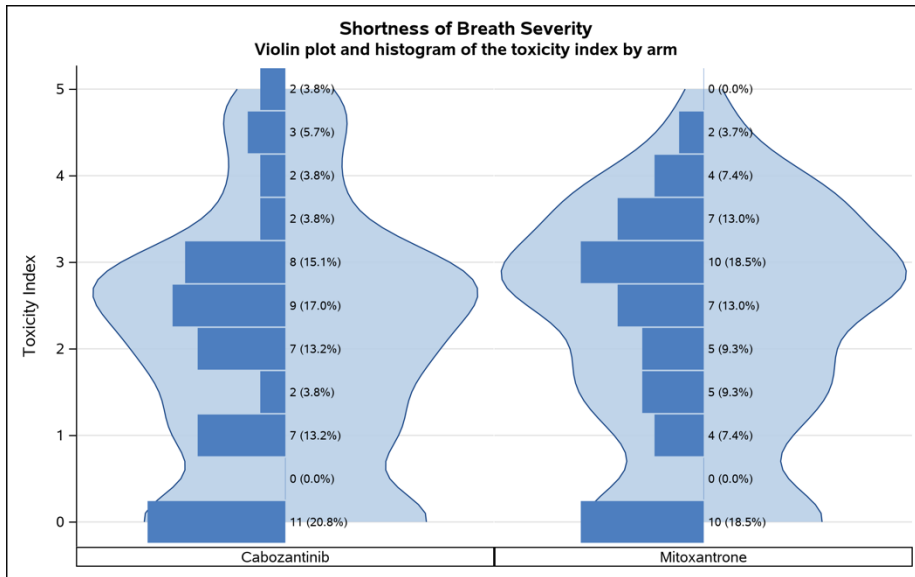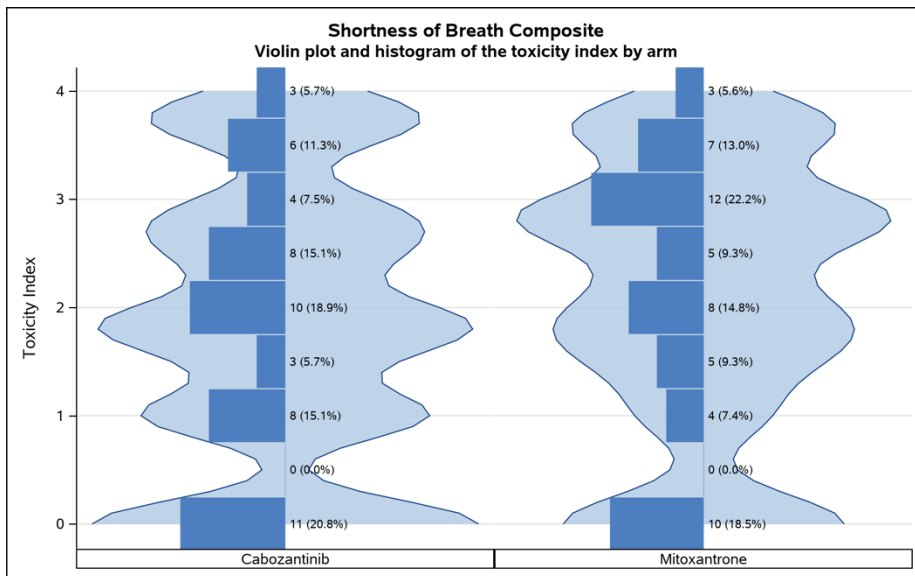

**Supplemental Figure 11. Density Histograms for all PROCTCAE Items and Composites, by Arm**

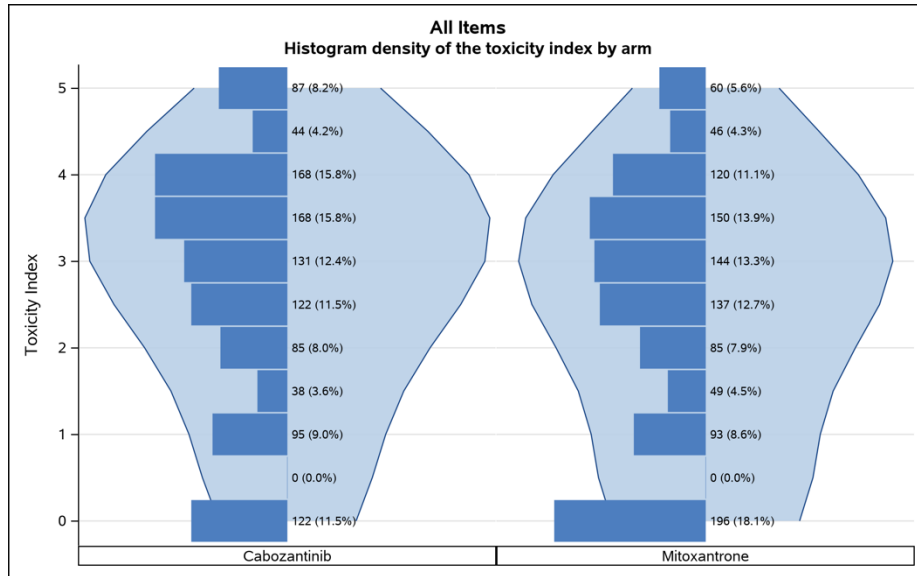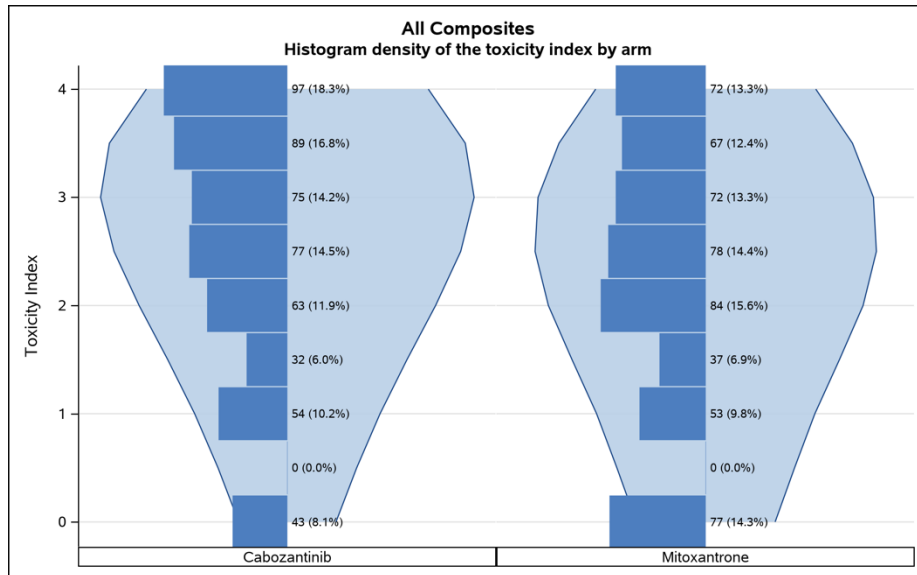

Supplement: NIHMS1765695-supplement-1.pdf [file NIHMS1765695-supplement-1.pdf]
